# Supplementary material
Source: ML conference proceedings conference paper supplement (https://openreview.net/forum?id=PPmOOMhMOW)
Supplement: supplementary_material [file attachment]

# Supplementary Materials: Prior Knowledge Integration via LLM Encoding and Pseudo Event Regulation for Video Moment Retrieval

Anonymous Author(s)

In this supplementary document, we offer additional examples to enhance comprehension of the method.

## 1 LLM ENDOERS AS RELATION REFINERS

We have validated the LLM encoders' ability to refine the inter-concept relations. This section presents more examples and illustrations to showcase their functionality on CLIP embeddings and in the VMR task.

### 1.1 How does it work on CLIP embeddings?

During the feasibility study, we examined how the LLM encoder refines inter-concept relations using triplets. To provide a clearer understanding, Fig. 1 presents more intuitive examples where we visualize the inter-conceptual similarity of CLIP embeddings before and after refinement using t-SNE. The figures illustrate that, after the refinement, the paired concepts are closer to each other (e.g., *car* and *road*), while the unpaired concepts are more distant (e.g., *car* and *printer*).

### 1.2 How does it work on VMR?

To demonstrate the process of relation refinement in the VMR task, we break down each query into individual concepts and utilize them as separate queries for VMR. We visualize the model's attention maps, showcasing its focus on both single-concept queries and the original queries (composed of combined concepts). From the Fig. 2 to Fig. 6, it is evident that with the LLM encoder, the model has demonstrated a better understanding on the composition of the concepts. The observations include:

**Increased accuracy of subject identification.** Upon completion of the refinement process, it becomes evident that the identification of individual concepts has significantly improved in terms of accuracy. This enhanced accuracy can be attributed to the increased consideration of context, as indicated by the refined inter-concept relations. Therefore, the predicted moments exhibit a comprehensive perspective that encompasses all concepts, rather than being dominated by visually prominent objects. For example, in Fig. 2, the post-refinement identification of the concept *Two guys* is markedly improved compared to a narrower moment range during the pre-refinement period. This is also observed in the identification of *competing* and *table tennis*. This observation indicates that the model possesses an improved comprehension of the scene, which is achieved through the collaborative efforts of the involved concepts. Another example in Fig. 3 demonstrates a refined precision in the detection of the concept *baby*. There is a misidentification of teenagers as *baby* when not applying refinement, but the proposed method is able to distinguish the similar semantics and localize the correct one. More examples can be found from Fig. 7, Fig. 4, and Fig. 5.

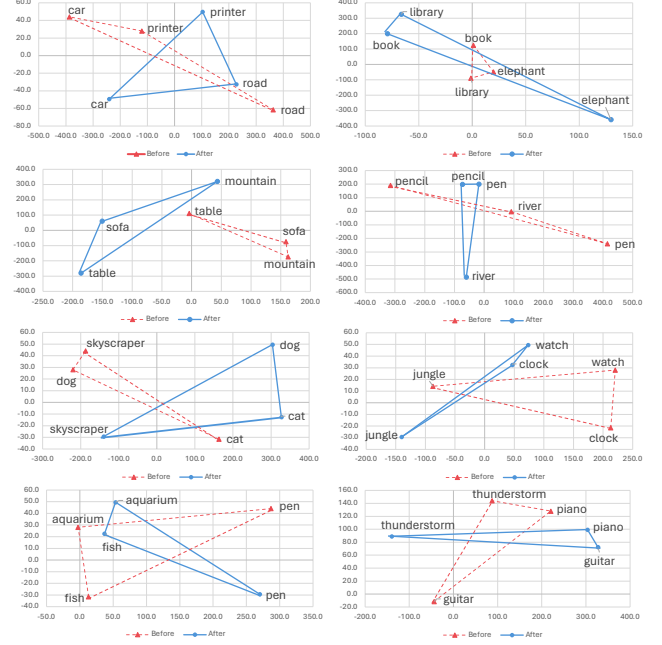

Figure 1: Visualization of the inter-conceptual similarity of the triplets before and after the refinement.

**Elimination of the irrelevant dominance.** Another observation is that the model gains awareness of background concepts such as scenes or events, allowing it to avoid biased focus solely on foreground concepts. In Fig. 6, the improved precision of the concept predictions is evident. In predictions made without the refiner, the results are influenced by the concept *car*, leading to an oversight prediction in a broader semantic context. However, with the refiner, the localization is narrowed, accurately encapsulating the *herd* as the focal point of the scene, thereby producing more precise predictions.

## 2 QUALITATIVE RESULTS

We provide qualitative results for QVHighlights in Fig. 8. Our method can more accurately locate moment boundaries without crossing them incorrectly, while also more accurately predicting the entire moment of the event, rather than just a portion of it.

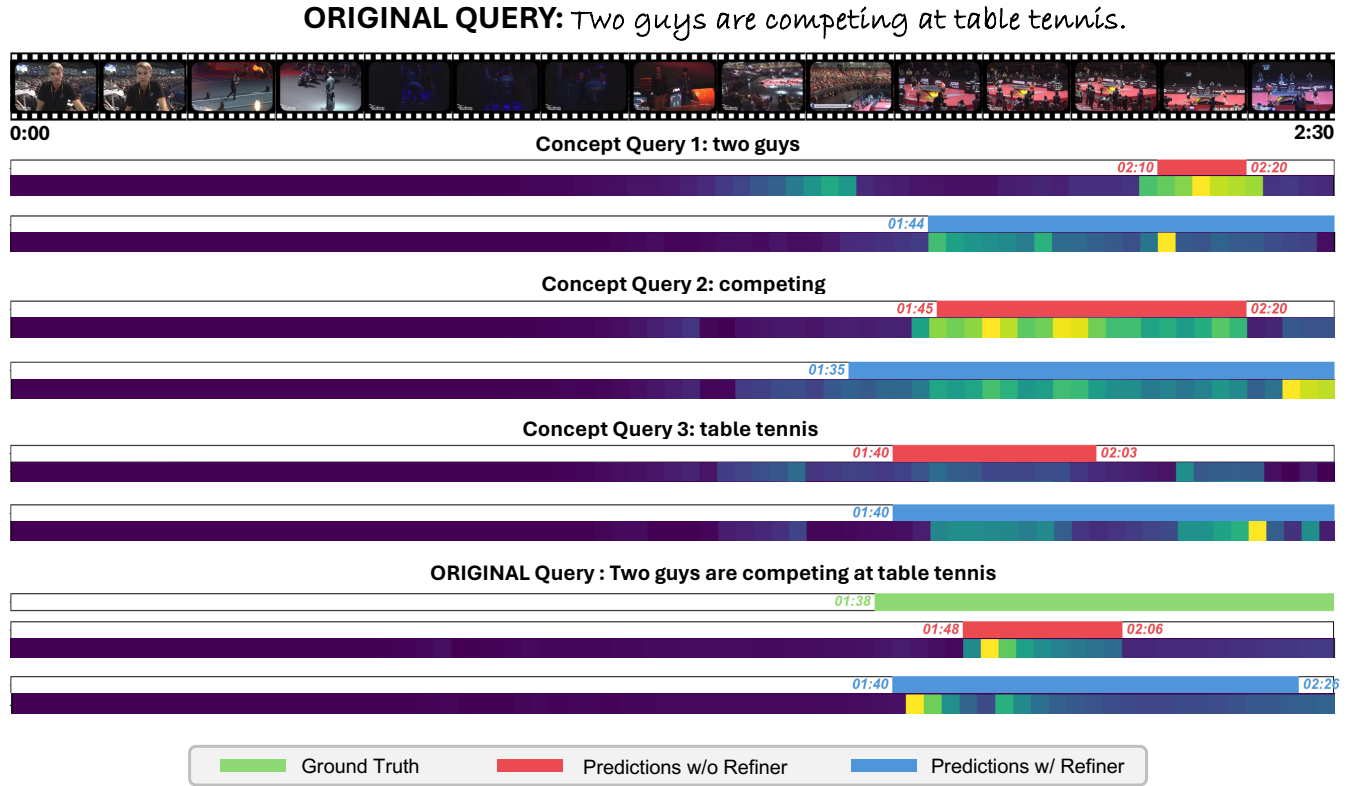

Figure 2: Visualization of Relation Refinement in the VMR Task. On the original query, the prediction made without the refiner is significantly affected by the dominant concepts *two guys* and *competing* (their prominence is evident from the high attention given to these concepts), while the contributions of other concepts are disregarded. By incorporating the refiner, the model has enhanced its comprehension of the collective semantics derived from multiple concepts. Notably, even subtle attention is given to each individual concept, with the refiner, the model has acknowledged the combined contributions of these concepts and ensured a more comprehensive coverage of the moment. This is an indication that the inter-concept relation has played a significant role during the inference.

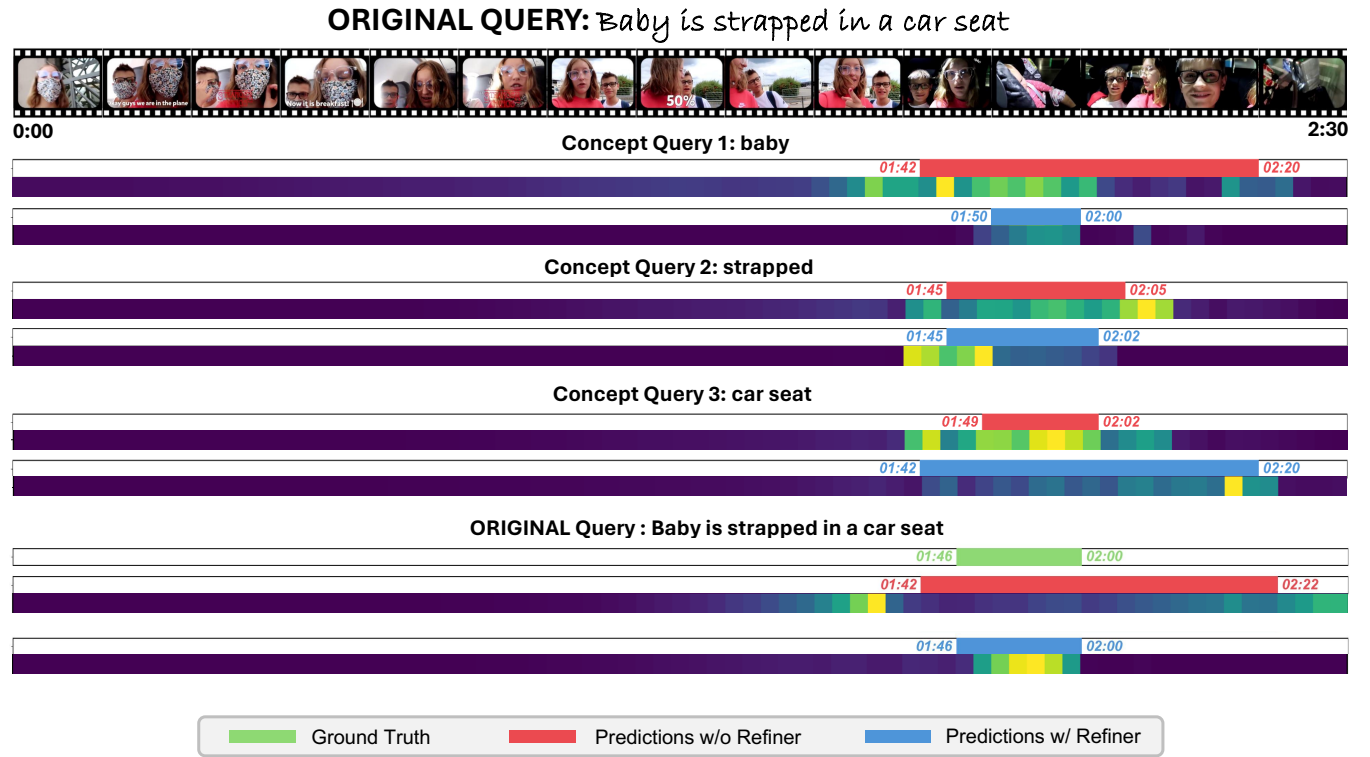

**Figure 3: Visualization of Relation Refinement in the VMR Task.** The primary concepts in this example are *baby* and *car seat*. Without the refiner, the model’s identification of the concept *baby* is distracted by the frequent appearance of teenagers, leading to a misleading moment alignment primarily focused on the segment containing the misidentified concept *baby*. However, with the refiner, the misidentification of concept *baby* is rectified. By contrast, the concept *car seat*, which was previously limited in scope due to its lack of visual prominence in the clip, exhibits a broader span after the refinement. This expansion suggests that contextual information (the in-car scene implied by other concepts) has been taken into account, reinforcing the significance of the concept *car seat*.

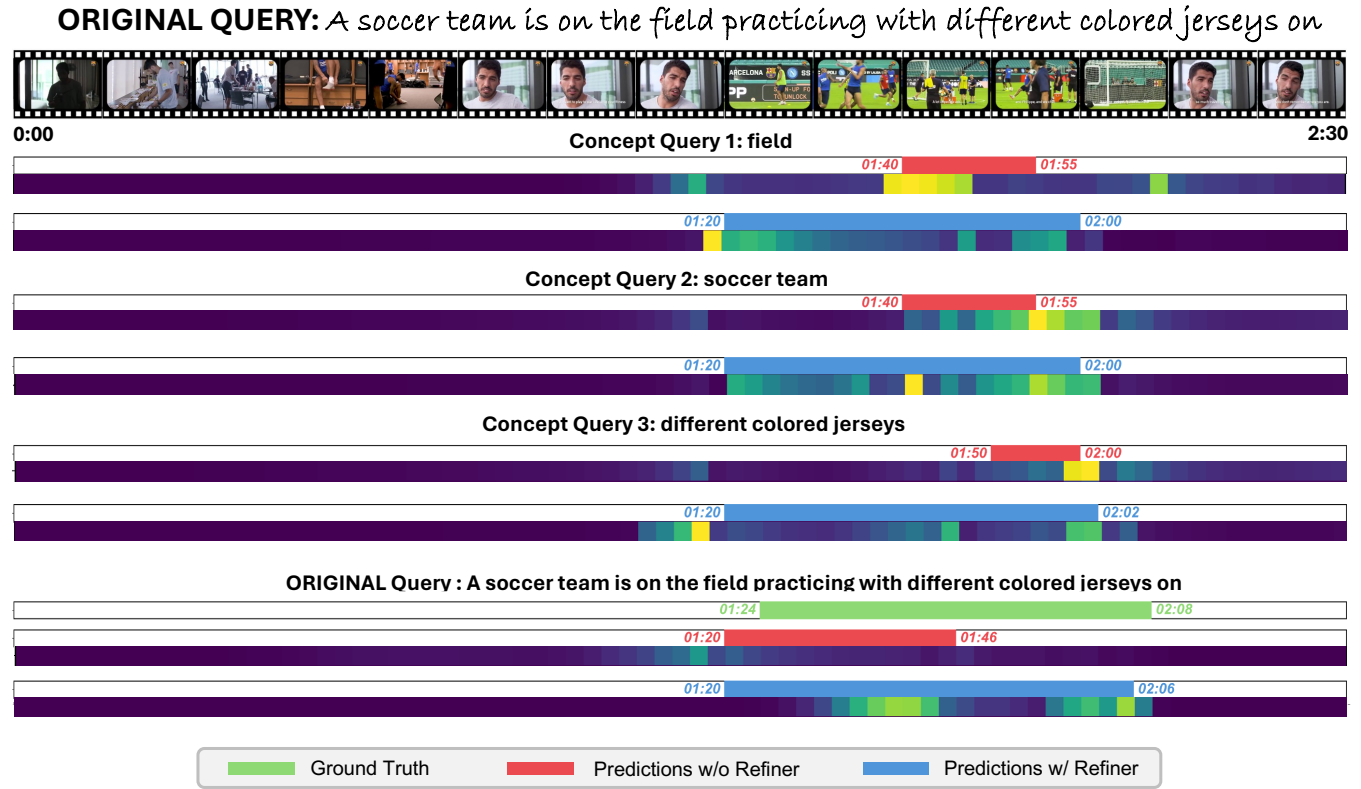

Figure 4: Visualization of Relation Refinement in the VMR Task. In the video, the concept *field* is the background, and the concept *soccer team* is the target objective of the video. The recognition accuracy of these two concepts controls the whole query corresponding to the ground truth. Without the refiner, the constant presence of the soccer team is interfered with the field in the background, resulting in both concepts being not fully recognized as individual concepts. This situation is solved with the refiner, which achieves a more detailed and comprehensive moment coverage.

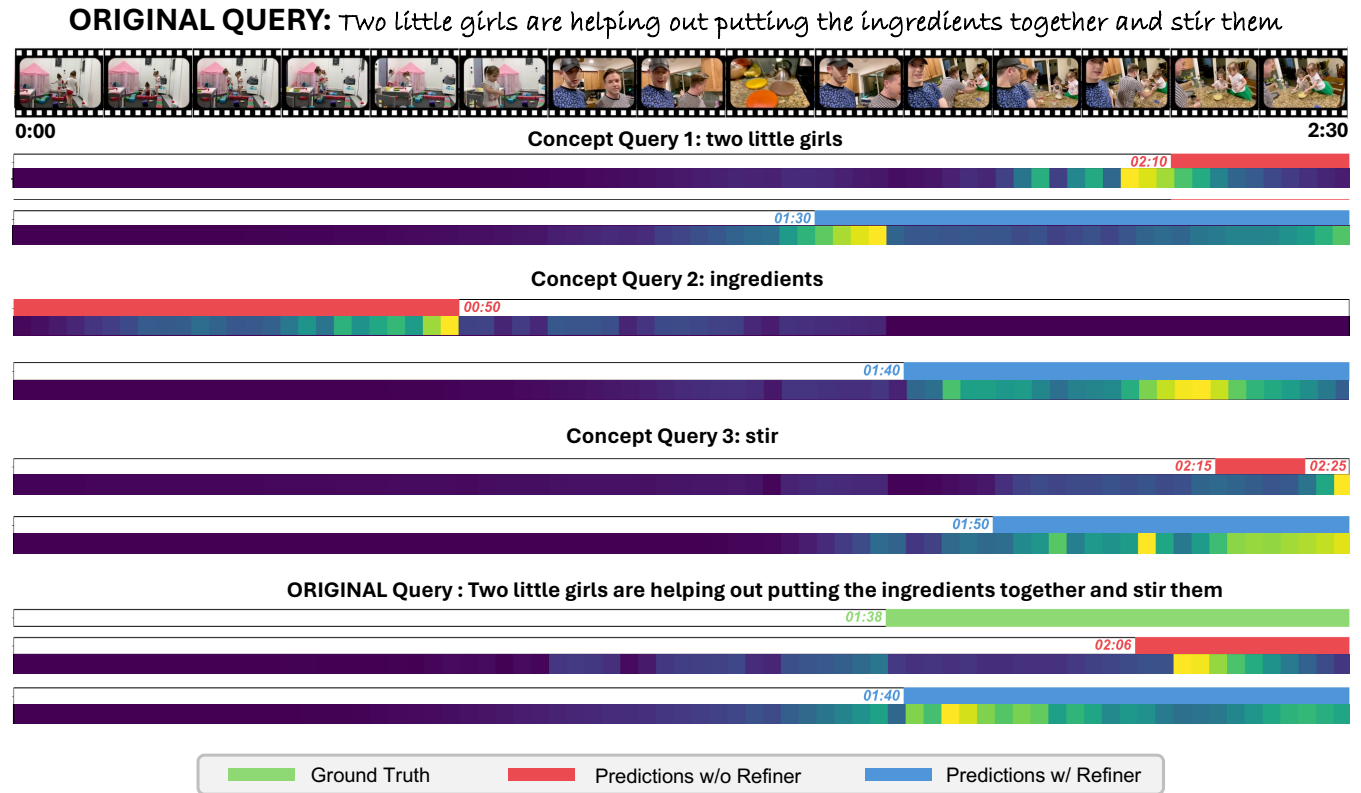

Figure 5: Visualization of Relation Refinement in the VMR Task. In this example, the action *stirring* is not visually prominent enough. This makes the model without the refiner neglect some of its presence. With the refiner, the model’s awareness of the context has been improved, resulting from the collective semantics provided concepts like *two girls*, *putting ingredients* and (potentially) other scene concepts not demonstrated.

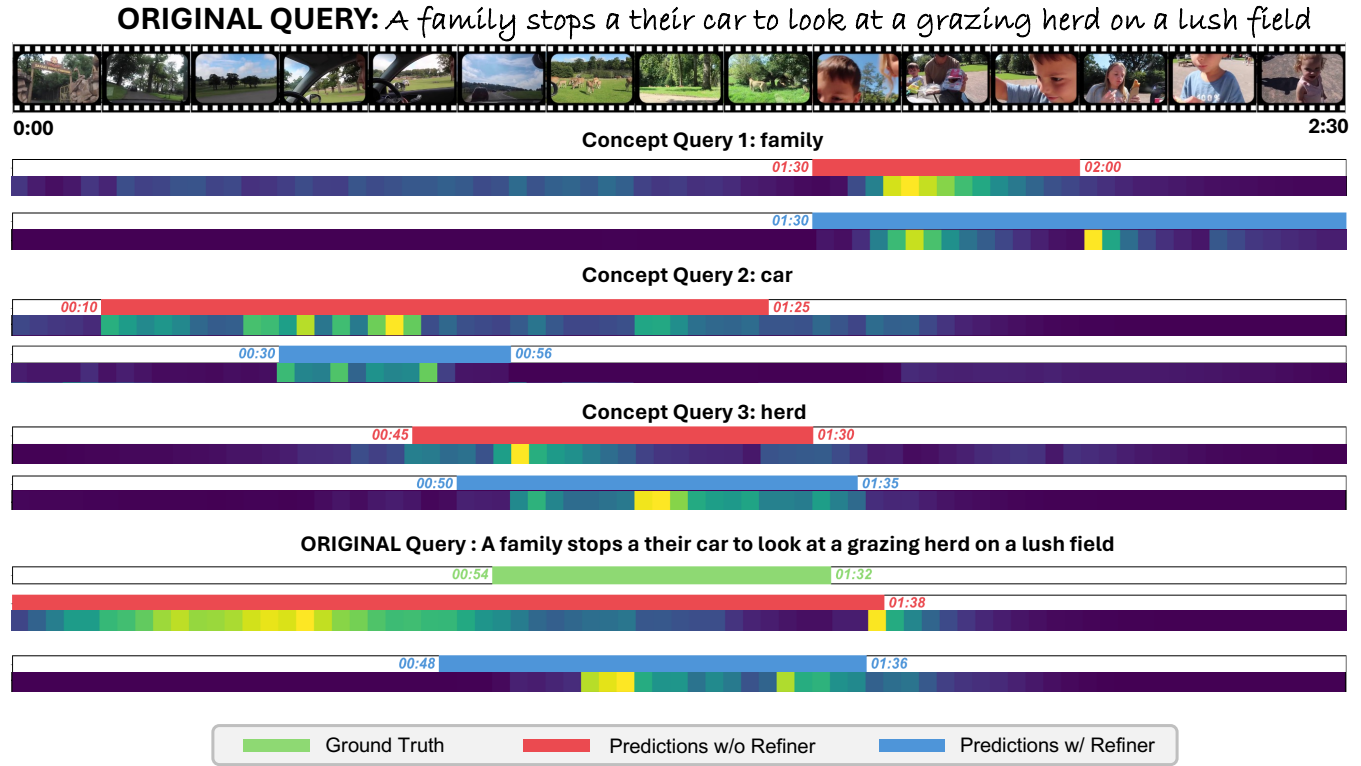

Figure 6: Visualization of Relation Refinement in the VMR Task. In this example, the context is the concept *herd* and the main target is the concept *car* and *family*. Without the refiner, each concept is recognized accurately, but the composite prediction of the query is dominated by the concept *car*. With the refiner, attention is shifted to the composite context, which correctly prioritizes the *herd* in the scene and achieves a consistent fusion of concepts.

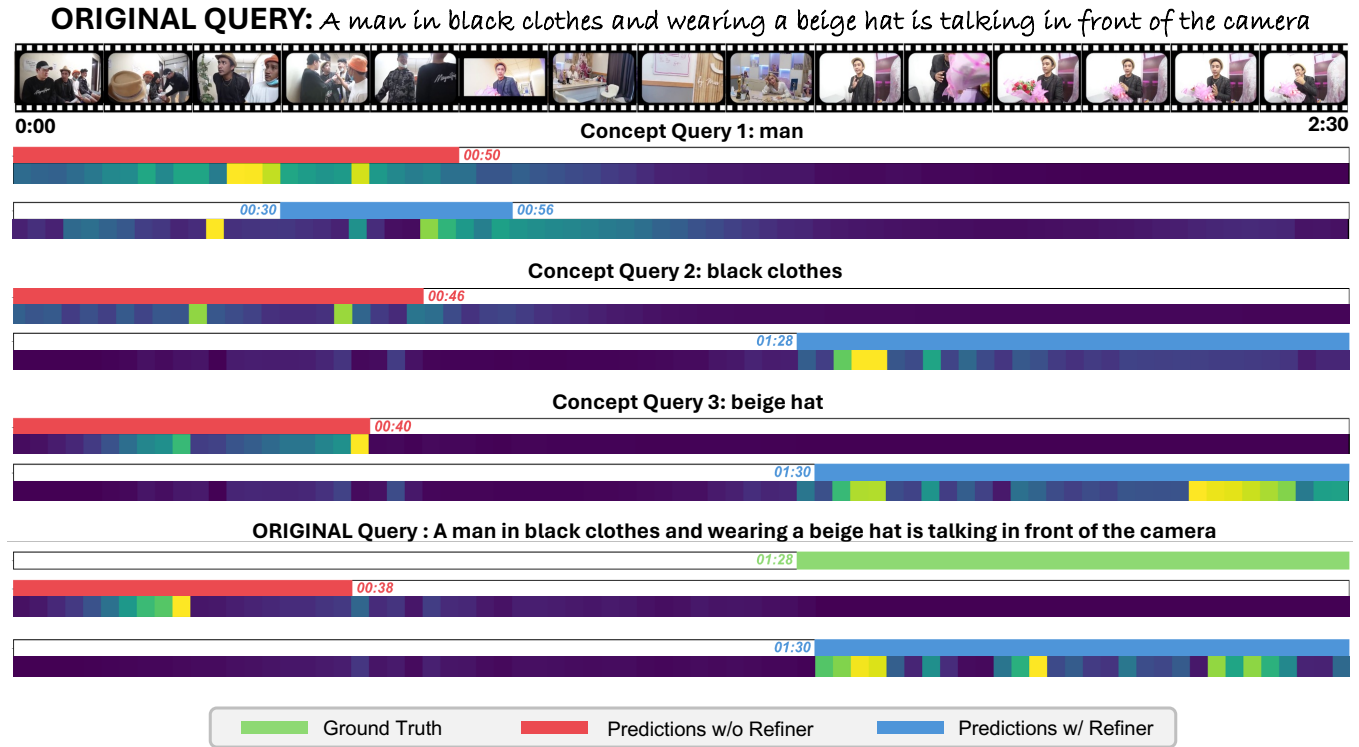

**Figure 7: Visualization of Relation Refinement in the VMR Task.** In this case, the most important concepts are *black clothes* and *beige hat*, while the concept *man* is a general target which appears throughout the video. Without the refiner, the concept *black clothes* and concept *beige hat* are both incorrectly identified, which leads to the final result being dominated by these two concepts. With the refiner, the identification of these two concepts is correct, which improves the overall accuracy of the query result. The model is more sensitive to *black clothes* and *beige hats*, thus does not conceptualize the *men* in the clip as the main query.



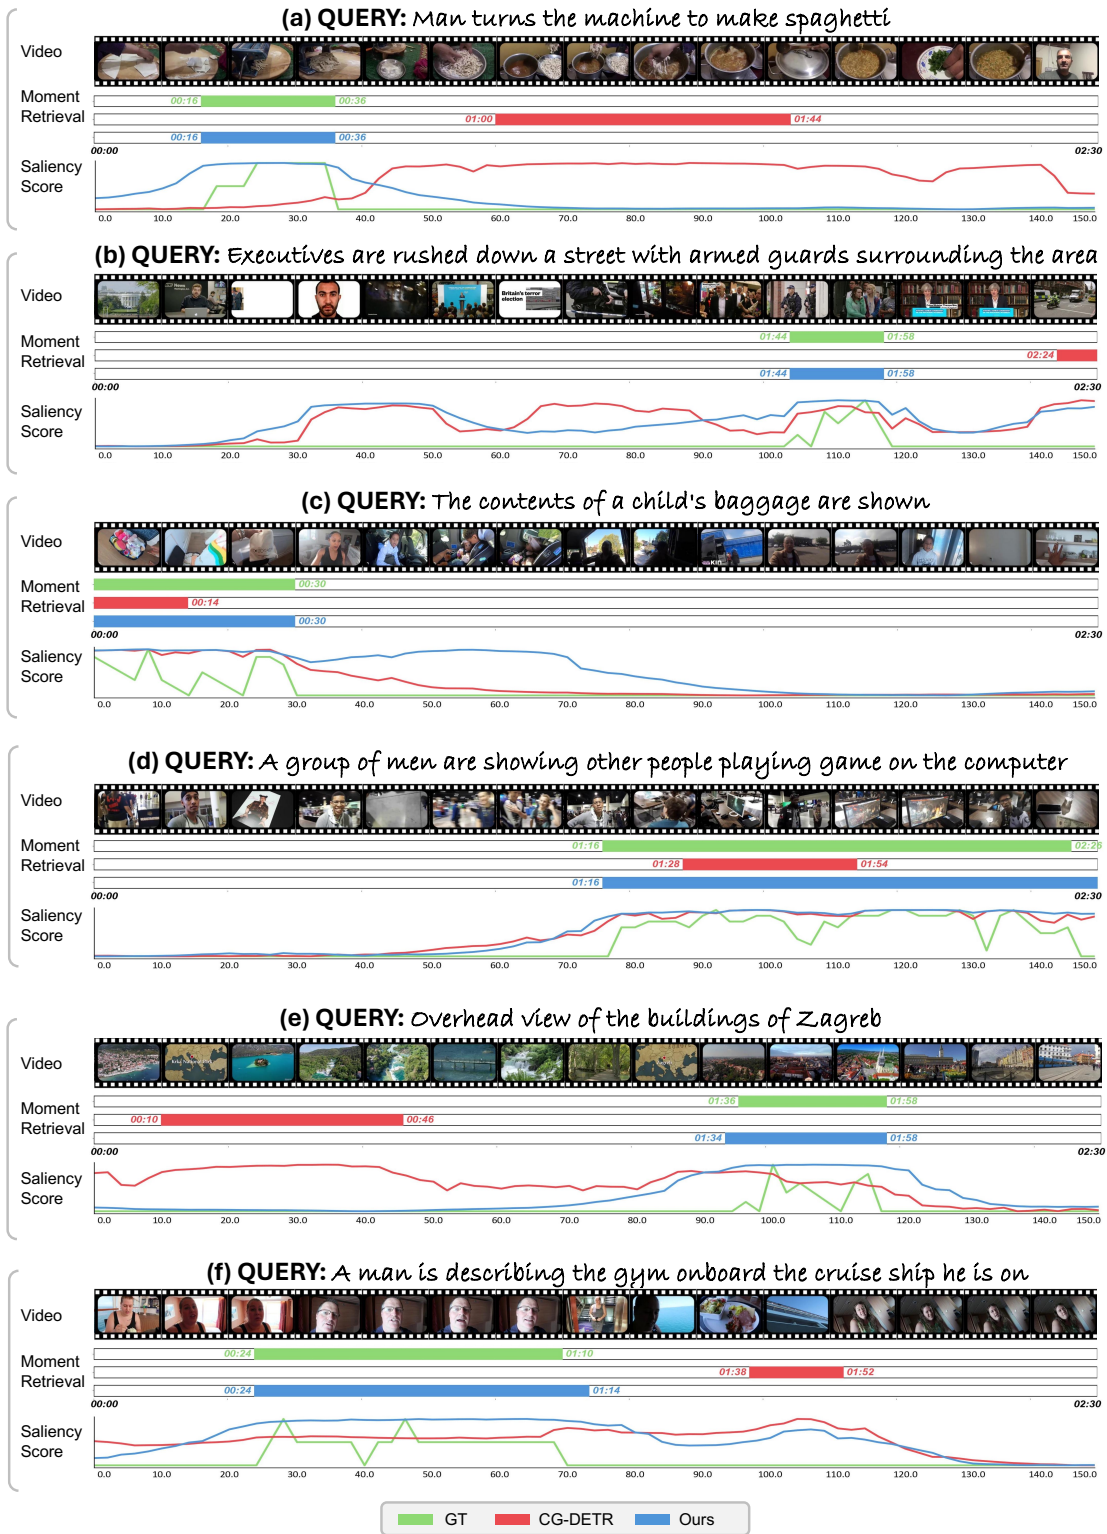

Figure 8: More visualizations of the joint moment retrieval and highlight detection results on QVHighlights val split. Our method accurately regresses moment boundaries and predicts highlight prominence scores with the help of the relation refiner.
